# Supplementary material for: Drosophila miR-277 controls branched-chain amino acid catabolism and affects lifespan
Source: PubMed Central journal article supplement — RNA Biol. 2013 Apr 30;10(6):1042–56. doi: 10.4161/rna.24810 (PMC3904584; doi:10.4161/rna.24810), 2013-04-30
Supplement: rna-10-1042-s01.pdf [file rna-10-1042-s01.pdf]

## **Supplemental Material to:**

**Stephanie Maria Esslinger, Björn Schwalb,  
Stephanie Helfer, Katharina Maria Michalik, Heidi Witte,  
Kerstin C. Maier, Dietmar Martin, Bernhard Michalke,  
Achim Tresch, Patrick Cramer, Klaus Förstemann**

***Drosophila* miR-277 controls branched-chain  
amino acid catabolism and affects lifespan**

**2013; 10(6)**

**<http://dx.doi.org/10.4161/rna.24810>**

**[www.landesbioscience.com/journals/rnabiology/article/24810/](http://www.landesbioscience.com/journals/rnabiology/article/24810/)**

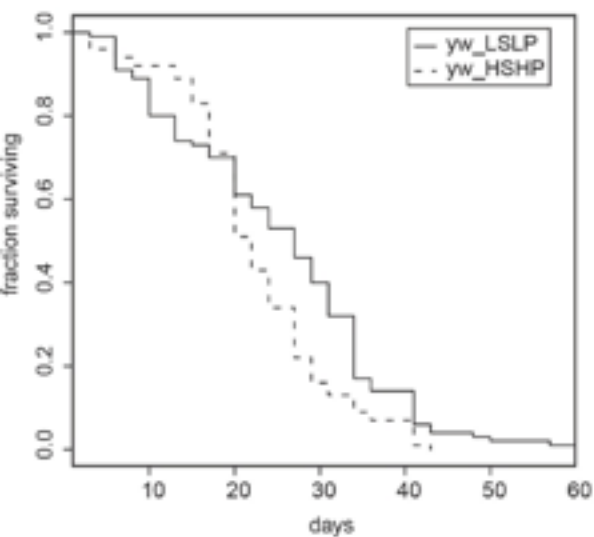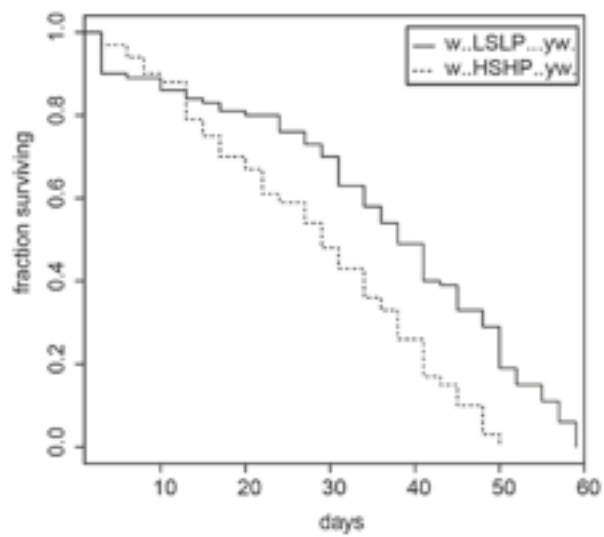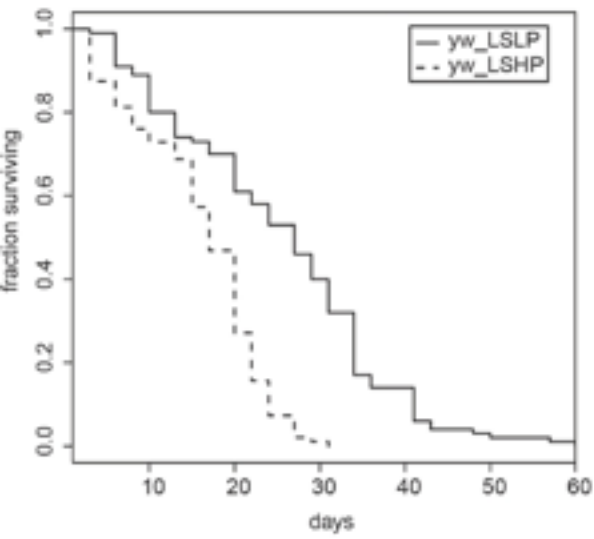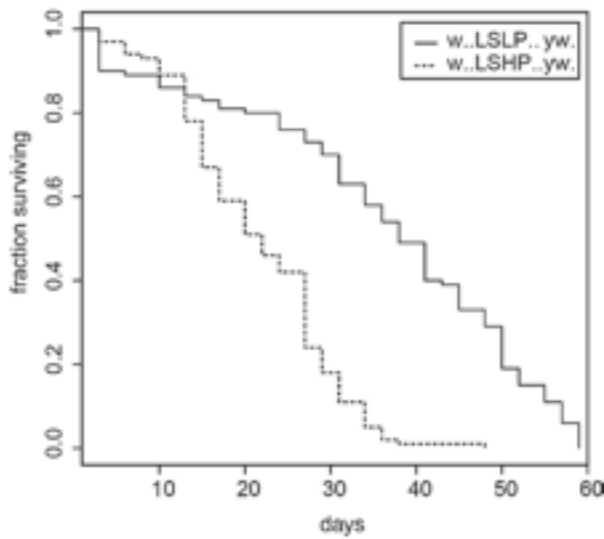

## male flies

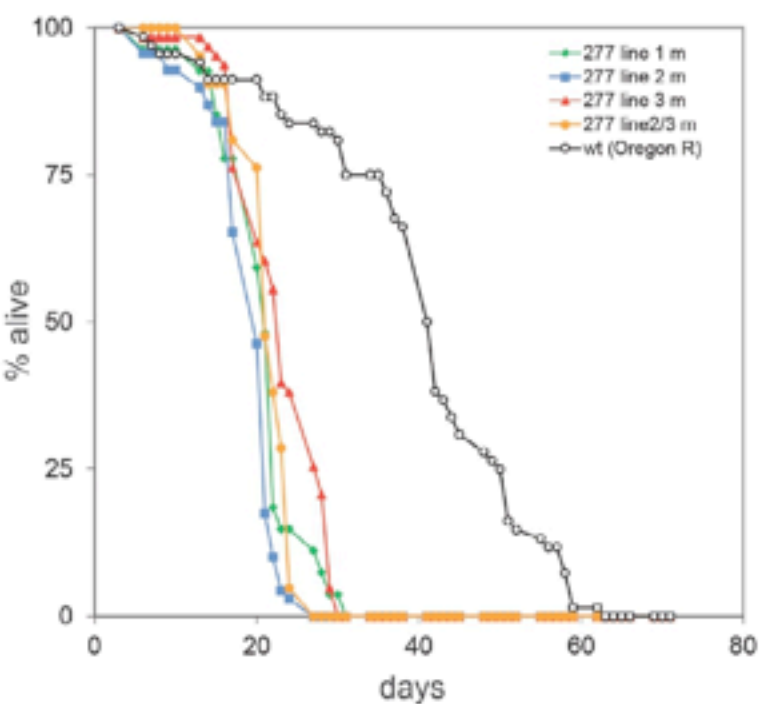

## female flies

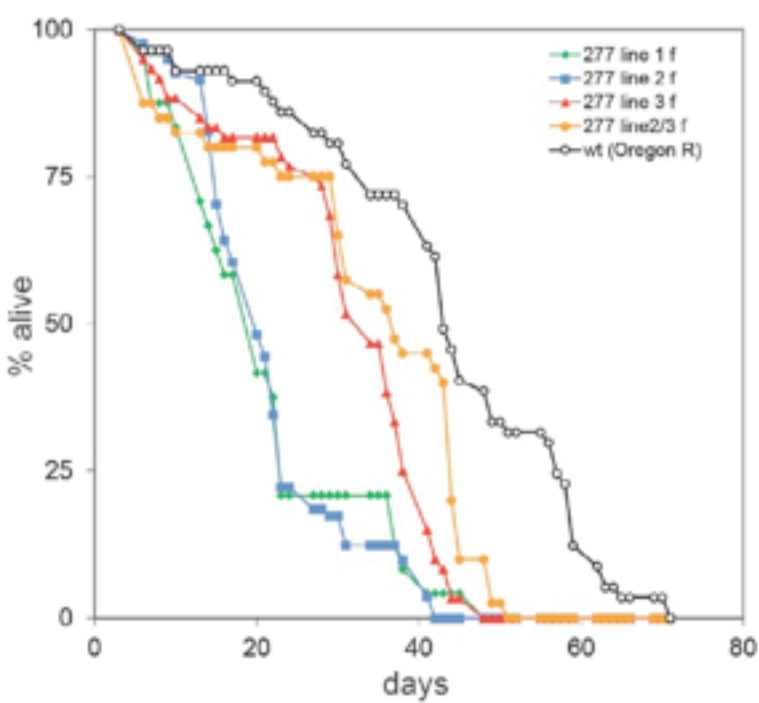

A

|                | <i>total reads</i> | <i>genome matching</i> | <i>mature miRNAs</i> | <i>miR 277 mature</i> |
|----------------|--------------------|------------------------|----------------------|-----------------------|
| miR-277 wt     | 24'422'705         | 17'425'600 (71.4 %)    | 2'735'413 (11.2 %)   | 16'166 (0.7 %)        |
| miR-277 mut. 1 | 9'490'975          | 7'506'412 (79.1 %)     | 2'087'243 (22.0 %)   | 1'561 (0.2 %)         |
| miR-277 mut. 2 | 1'079'302          | 670'894 (62.6 %)       | 234'676 (21.7 %)     | 179 (0.2 %)           |

B

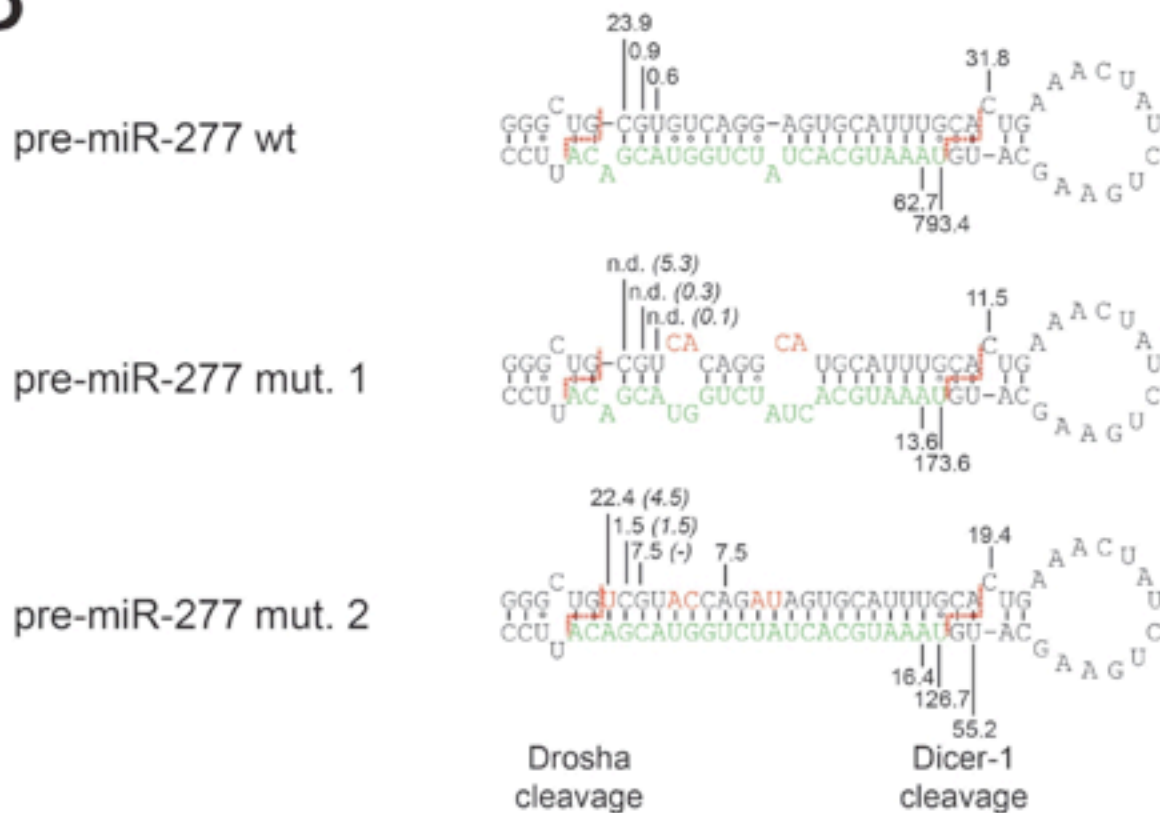

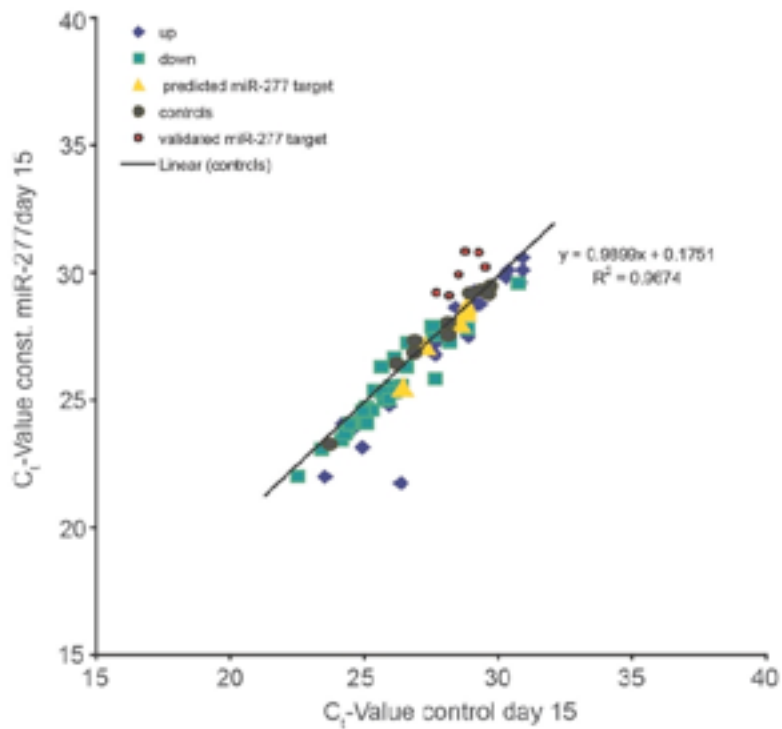



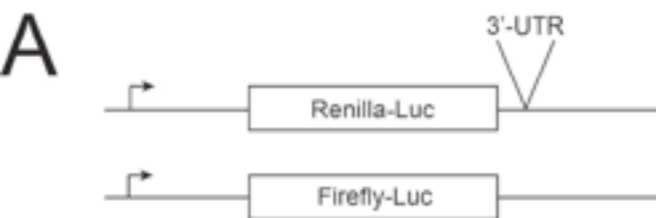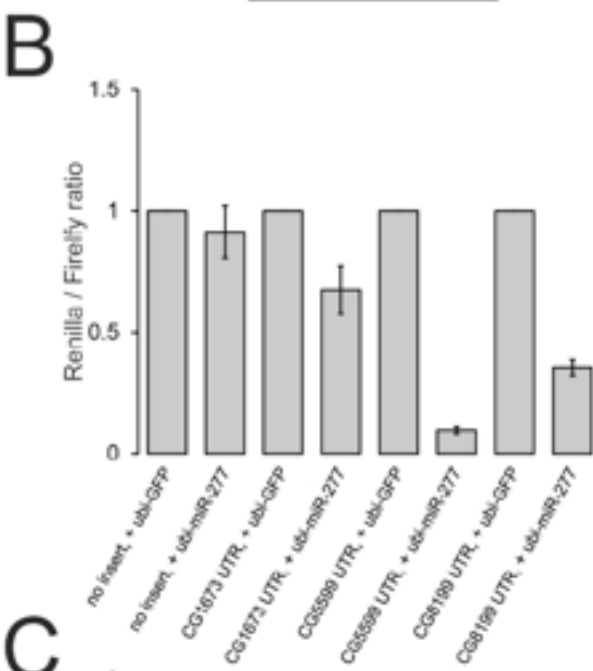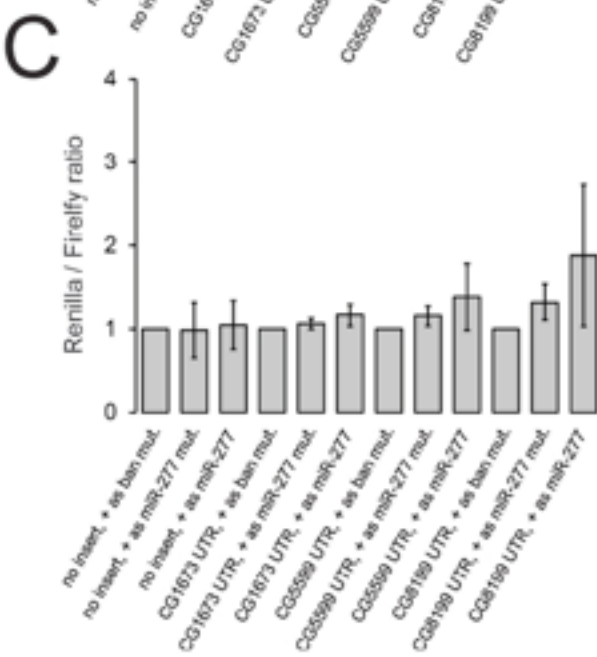

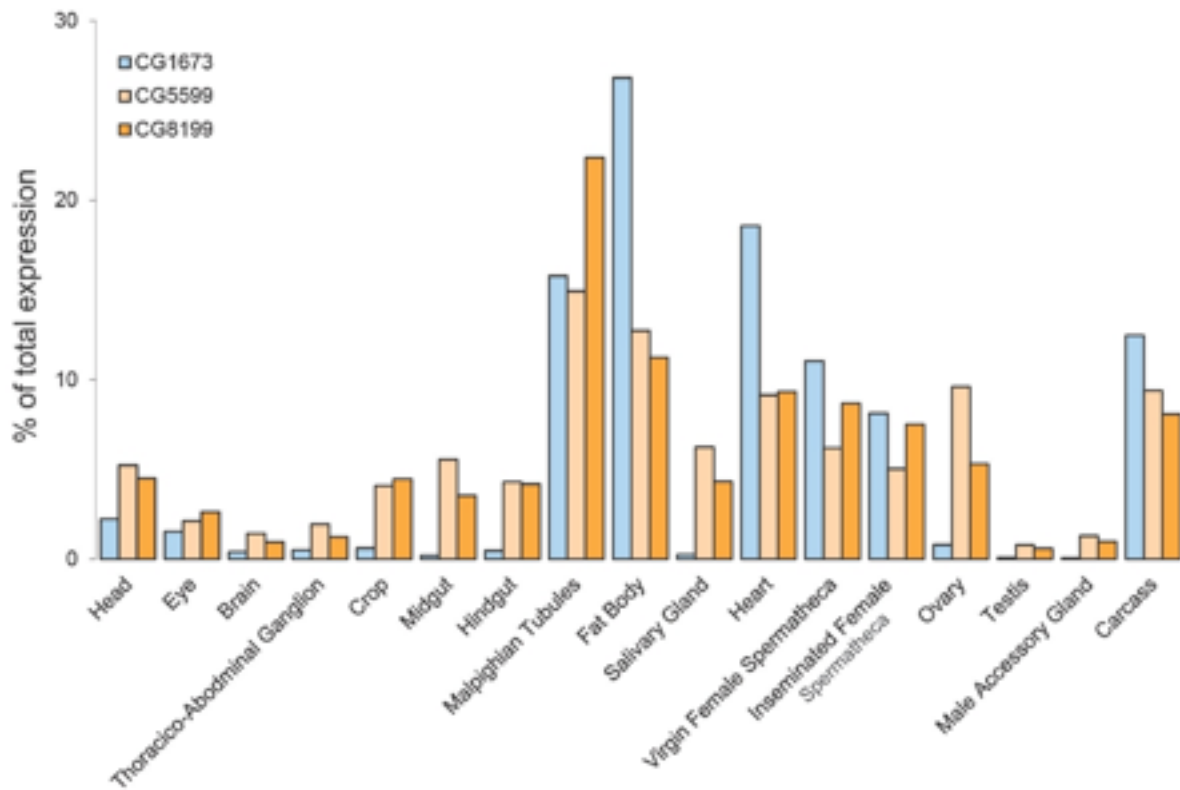



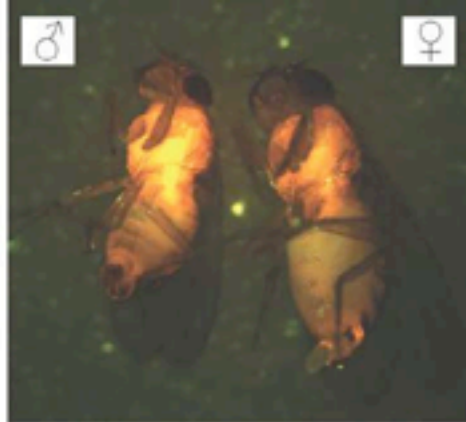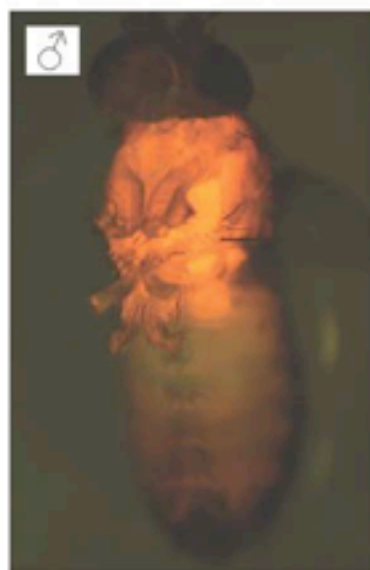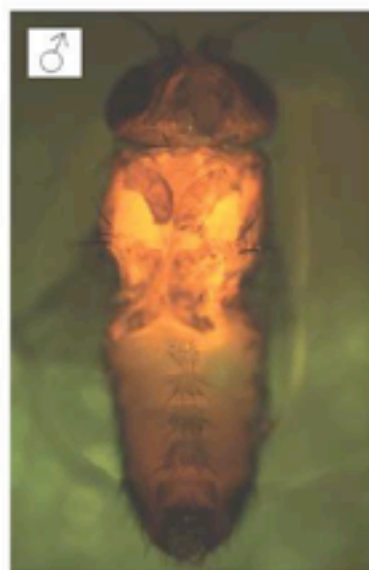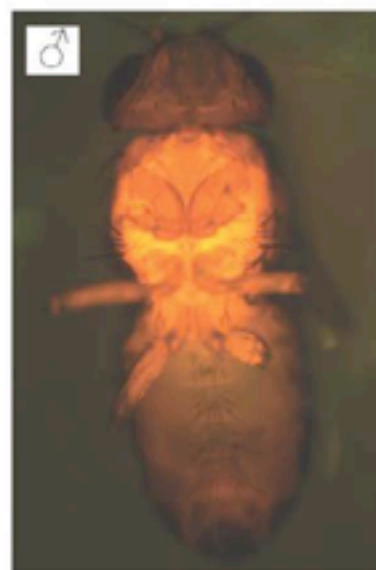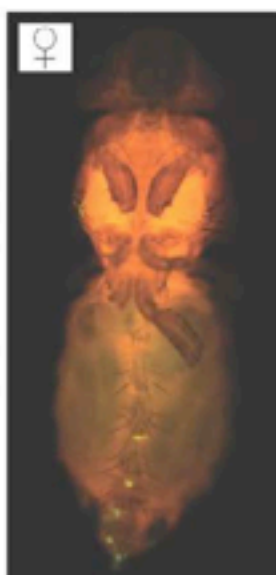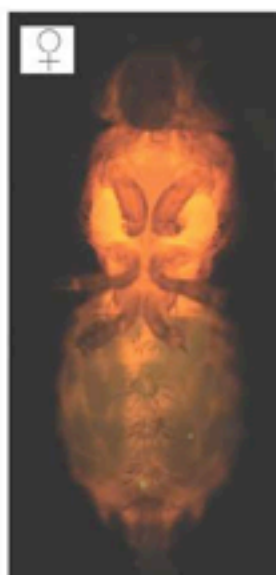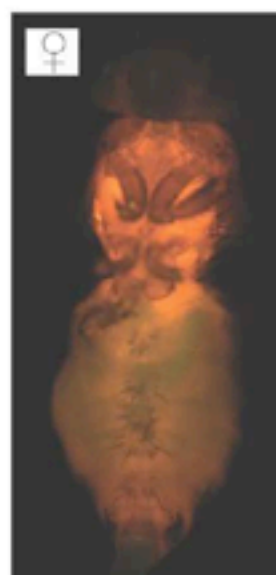

A

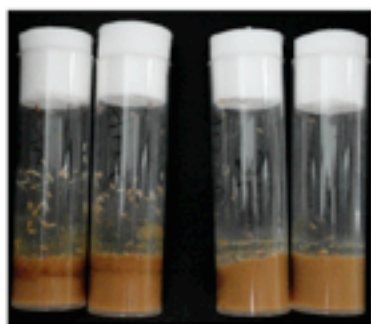

control  
(0.1% DMSO)

20  $\mu$ M Rapamycin  
(in 0.1% DMSO)

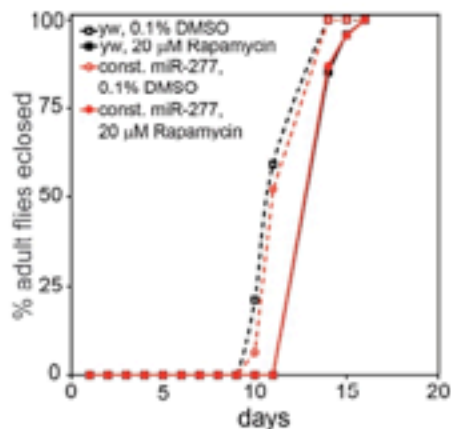

B

standard  
fly food

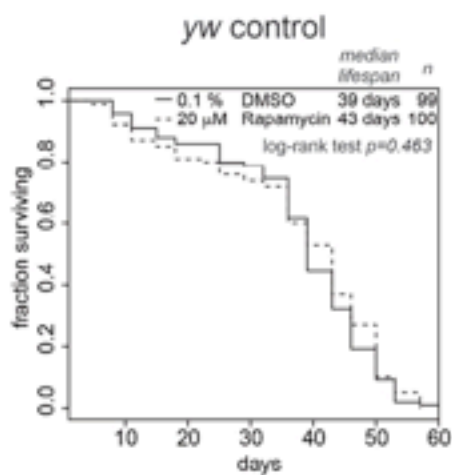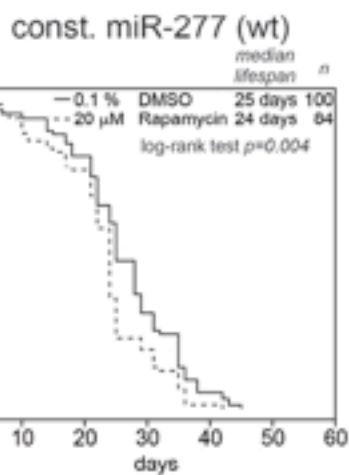

LSHP  
fly food

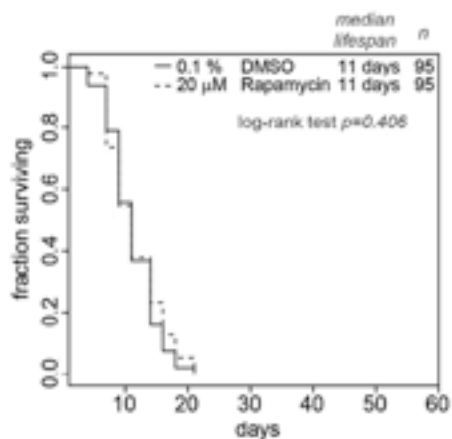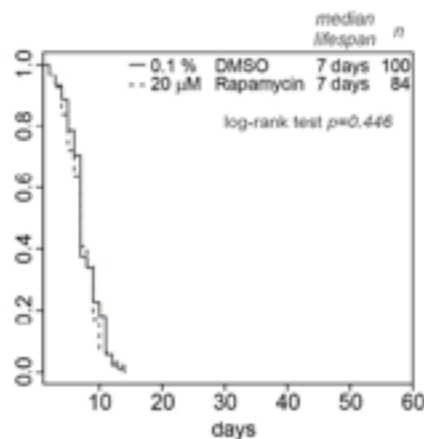

**Supplemental Figure 1. Survival curves of control flies on the three different food compositions.** The survival curves compare LSLP food (= caloric restriction) to rich (HSHP) and imbalanced (LSHP) food. The panels on the left show data from *yw* flies, the panels on the right show data from *w<sup>1118</sup>* back-crossed into *yw*. The lifespan data shown here are identical to the survival curves in Fig. 2 of the manuscript but different comparisons are shown.

**Supplemental Figure 2. Validation of lifespan shortening induced by constitutive miR-277 with three independent transgenic lines as well as a trans-heterozygous combination.** Flies were maintained on standard laboratory medium for these experiments.

**Supplemental Figure 3. Deep sequencing of small RNAs derived from wild-type and mutant pre-miR-277 hairpins.** (A) The table shows the read numbers and general mapping results obtained for our libraries. (B) Normalized read numbers (expressed as ppm of genome matching) are mapped to the structure of the hairpin. The position indicates the 5'-end of the small RNA sequenced; in the case of the mutant hairpins, the numbers in parenthesis indicate how many reads matched the wild type sequence at the analogous position.

**Supplemental Figure 4. Validation of mRNA changes induced by miR-277 with qRT-PCR.** A panel of genes known to be up- or down-regulated with age as well as a set of controls were quantified by qRT-PCR. In addition, we profiled several predicted miR-277 targets (see suppl. Table 4 for genes and primer sequences). Down-regulation of miR-277 targets that were validated in our transcriptomic analysis is clearly visible, while the non-validated targets did not respond to elevated miR-277 levels on day 15.

**Supplemental Figure 5. Impact of miR-277 on the BCAA catabolic pathway.** Gene names indicated in red represent mRNAs that responded significantly to elevated miR-277 levels in flies (left panel) or miR-277 inhibition in S2-cells (right panel). The first enzyme of the pathway (CG1673 = BCAT) is a predicted miR-277 target but did not respond in either case.

**Supplemental Figure 6. The 3'-UTR of CG1673 is less sensitive to miR-277 overexpression.** (A) Schematic representation of the reporter design. (B) Co-transfection of the reporter (Renilla) and control (Firefly) Luciferase expression vectors with a miR-277 overexpression plasmid efficiently represses the CG5599 and CG8199 3'-UTRs but not the one of CG1673. (C) Inhibition of endogenous miR-277 in S2-cells only yielded a trend that is consistent with the observations in (B).

**Supplemental Figure 7. Tissue distribution of three enzymes that degrade threonine.** Expression levels of threonine-ammonia-lyase (CG8129), threonine aldolase (CG10184) and threonine-3-dehydrogenase (CG5955) based on expression data available through Flybase.

**Supplemental Figure 8. Expression of miR-277 in the thorax.** We cloned a 4 kb fragment upstream of miR-277 into the Gal4-expression vector pPTGal4, then generated transgenic fly lines by P-element mediated transgenesis. The miR-

277<sub>pr</sub>-Gal4 driver lines were then crossed to UAS-DsRed reporter flies and expression of DsRed was imaged with a Leica fluorescence stereomicroscope. Strong expression in the thorax of both male and female flies was seen with three independent Gal4 driver lines.

**Supplemental Figure 9. Rapamycin feeding did not extend life span of male flies.**

(A) The efficacy of our rapamycin supplementation was validated by the characteristic delay in larval development (left) and the resulting delay in eclosion (right). (B) No life span changes were observed in rapamycin fed flies compared with DMSO controls for both wild type (left) and transgenic miR-277 expressing flies (right).

| Gene            | Position | P-value | T   | Q  | Q&T   | Q&T/Q | Q&T/T           | term ID | term domain and name                                                           |
|-----------------|----------|---------|-----|----|-------|-------|-----------------|---------|--------------------------------------------------------------------------------|
| HP:0000007      | 4.17e-05 | 741     | 367 | 53 | 0.869 | 0.072 | HP:0000007      | hp      | Autosomal recessive inheritance (1)                                            |
| HP:0002017      | 1.10e-05 | 117     | 367 | 18 | 0.295 | 0.154 | HP:0002017      | hp      | Nausea and vomiting (1)                                                        |
| HP:0002013      | 9.66e-06 | 116     | 367 | 18 | 0.295 | 0.195 | HP:0002013      | hp      | Vomiting (2)                                                                   |
| HP:0001946      | 6.74e-06 | 22      | 367 | 8  | 0.131 | 0.364 | HP:0001946      | hp      | Ketosis (1)                                                                    |
| MI:dme-miR-184* | 4.61e-04 | 300     | 368 | 20 | 0.072 | 0.067 | MI:dme-miR-184* | mi      | MI:dme-miR-184* (1)                                                            |
| MI:dme-miR-277  | 1.65e-19 | 421     | 368 | 52 | 0.187 | 0.124 | MI:dme-miR-277  | mi      | MI:dme-miR-277 (1)                                                             |
| REAC:485617     | 1.62e-10 | 109     | 345 | 23 | 0.319 | 0.211 | REAC:485617     | re      | Metabolism of amino acids (1)                                                  |
| REAC:485660     | 3.23e-15 | 20      | 345 | 14 | 0.194 | 0.700 | REAC:485660     | re      | Branched-chain amino acid catabolism (2)                                       |
| REAC:485662     | 1.15e-05 | 8       | 345 | 5  | 0.069 | 0.625 | REAC:485662     | re      | Valine catabolism (3)                                                          |
| REAC:485679     | 4.93e-08 | 10      | 345 | 7  | 0.097 | 0.700 | REAC:485679     | re      | Leucine catabolism (3)                                                         |
| REAC:485659     | 1.87e-06 | 10      | 345 | 6  | 0.083 | 0.600 | REAC:485659     | re      | Isoleucine catabolism (3)                                                      |
| REAC:485811     | 1.33e-04 | 34      | 345 | 8  | 0.111 | 0.235 | REAC:485811     | re      | Phase 1 functionalization (1)                                                  |
| REAC:485810     | 6.49e-05 | 31      | 345 | 8  | 0.111 | 0.258 | REAC:485810     | re      | Cytochrome p450 (2)                                                            |
| REAC:486182     | 2.87e-05 | 28      | 345 | 8  | 0.111 | 0.286 | REAC:486182     | re      | P450 Prostaglandin isomerizations (3)                                          |
| REAC:485972     | 5.00e-05 | 30      | 345 | 8  | 0.111 | 0.267 | REAC:485972     | re      | P450 Hydroxylations (3)                                                        |
| REAC:485971     | 2.87e-05 | 28      | 345 | 8  | 0.111 | 0.286 | REAC:485971     | re      | Simple hydroxylation (4)                                                       |
| REAC:485809     | 5.00e-05 | 30      | 345 | 8  | 0.111 | 0.267 | REAC:485809     | re      | P450 Epoxidations (3)                                                          |
| REAC:478368     | 2.87e-05 | 28      | 345 | 8  | 0.111 | 0.286 | REAC:478368     | re      | Aflatoxin B1 oxidized to aflatoxin-8,9-oxide (4)                               |
| REAC:485992     | 3.82e-05 | 29      | 345 | 8  | 0.111 | 0.276 | REAC:485992     | re      | P450 Dehydrogenation of alkanes to form alkenes (3)                            |
| REAC:481219     | 2.87e-05 | 28      | 345 | 8  | 0.111 | 0.286 | REAC:481219     | re      | Dehydrogenation of Testosterone to form 6-Dehydrotestosterone (4)              |
| REAC:485967     | 8.32e-05 | 32      | 345 | 8  | 0.111 | 0.250 | REAC:485967     | re      | Cytochrome P450 - arranged by substrate type (1)                               |
| REAC:485973     | 2.87e-05 | 28      | 345 | 8  | 0.111 | 0.286 | REAC:485973     | re      | Fatty acids (2)                                                                |
| REAC:480926     | 2.87e-05 | 28      | 345 | 8  | 0.111 | 0.286 | REAC:480926     | re      | CYP4F12 hydroxylates arachidonic acid (3)                                      |
| REAC:480893     | 2.87e-05 | 28      | 345 | 8  | 0.111 | 0.286 | REAC:480893     | re      | CYP4B1 can 12-hydroxylate arachidonic acid (3)                                 |
| REAC:480862     | 2.87e-05 | 28      | 345 | 8  | 0.111 | 0.286 | REAC:480862     | re      | CYP4A11 omega-hydroxylates laurate (3)                                         |
| REAC:485974     | 2.87e-05 | 28      | 345 | 8  | 0.111 | 0.286 | REAC:485974     | re      | Eicosanoids (2)                                                                |
| REAC:480957     | 2.87e-05 | 28      | 345 | 8  | 0.111 | 0.286 | REAC:480957     | re      | CYP4F2 omega-hydroxylate leukotriene B4, thus inactivating it (3)              |
| REAC:485969     | 6.49e-05 | 31      | 345 | 8  | 0.111 | 0.258 | REAC:485969     | re      | Xenobiotics (2)                                                                |
| REAC:480958     | 2.87e-05 | 28      | 345 | 8  | 0.111 | 0.286 | REAC:480958     | re      | CYP4F8 hydroxylates prostaglandin H2 (3)                                       |
| REAC:485969     | 6.49e-05 | 31      | 345 | 8  | 0.111 | 0.258 | REAC:485969     | re      | Xenobiotics (2)                                                                |
| REAC:480829     | 2.87e-05 | 28      | 345 | 8  | 0.111 | 0.286 | REAC:480829     | re      | CYP3A5 oxidises aflatoxin B1 to aflatoxin-8,9-oxide (3)                        |
| REAC:480831     | 2.87e-05 | 28      | 345 | 8  | 0.111 | 0.286 | REAC:480831     | re      | CYP3A7 can 6beta-hydroxylate testosterone (3)                                  |
| REAC:480737     | 2.87e-05 | 28      | 345 | 8  | 0.111 | 0.286 | REAC:480737     | re      | CYP3A4 can N-demethylate loperamide (3)                                        |
| REAC:485970     | 6.49e-05 | 31      | 345 | 8  | 0.111 | 0.258 | REAC:485970     | re      | Unknown (2)                                                                    |
| REAC:480798     | 2.87e-05 | 28      | 345 | 8  | 0.111 | 0.286 | REAC:480798     | re      | CYP3A43 catalyzes the 6beta-hydroxylation of testosterone (3)                  |
| REAC:480924     | 2.87e-05 | 28      | 345 | 8  | 0.111 | 0.286 | REAC:480924     | re      | CYP4F11 omega-hydroxylates 3-hydroxypalmitate (3)                              |
| REAC:486052     | 1.57e-04 | 44      | 345 | 9  | 0.125 | 0.205 | REAC:486052     | re      | Prostanoid hormones (1)                                                        |
| REAC:485186     | 2.87e-05 | 28      | 345 | 8  | 0.111 | 0.286 | REAC:485186     | re      | Thromboxane synthase (CYP5A1) mediates the isomerization of prostaglandin H... |
| REAC:485576     | 1.65e-04 | 112     | 345 | 15 | 0.208 | 0.134 | REAC:485576     | re      | Metabolism of lipids and lipoproteins (1)                                      |
| REAC:485615     | 1.57e-04 | 7       | 345 | 4  | 0.056 | 0.571 | REAC:485615     | re      | Ketone body metabolism (2)                                                     |
